# Supplementary material
Source: Springer Nature journal article supplement (https://www.springermedizin.de/resource/supplementary/12885_2008_1243_MOESM1_ESM.pdf/9471518)

MCF-7

BT-474

SK-BR-3

ZR-75

HER2

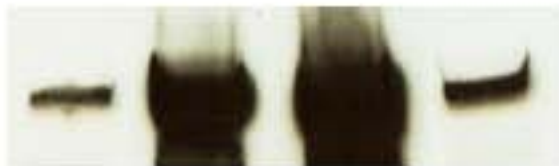

ObR

190  
160  
150

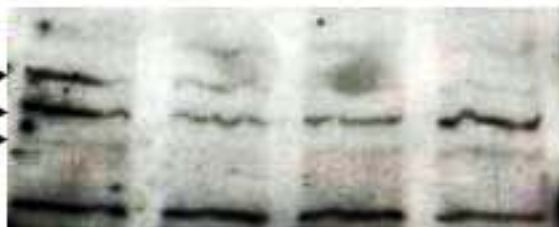

GAPDH

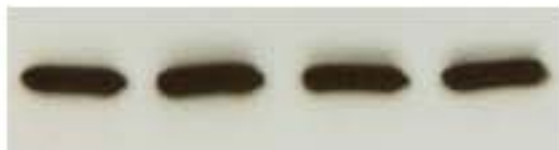

Supplement: MOESM1 [file 9471518]
